# Supplementary material
Source: PubMed Central journal article supplement (PMC3318141)
Supplement: mmc1.pdf [file mmc1.pdf]

## **Supporting Material**

### **NMR Observable-Based Structure Refinement of DAP12-NKG2C Activating Immunoreceptor Complex in Explicit Membrane**

Xi Cheng and Wonpil Im

Department of Molecular Biosciences and Center for Bioinformatics, The University of Kansas, Lawrence KS, USA

**Table S1** System information

| System  | # of water molecules | # of detergents/<br>lipids | # of ions                          | # of atoms | Box size ( $\text{\AA}^3$ ) |
|---------|----------------------|----------------------------|------------------------------------|------------|-----------------------------|
| Micelle | 16,476               | 13 SDS, 130 TPC            | 55 $\text{K}^+$ , 44 $\text{Cl}^-$ | 60,230     | 83.8×83.8×83.8              |
| Bilayer | 7,411                | 129 DMPC                   | 19 $\text{K}^+$ , 18 $\text{Cl}^-$ | 38,937     | 65.6×65.6×87.3              |

**Table S2** Orientation of DAP12-NKG2C transmembrane helix complex in terms of helix-helix distance ( $D$ ) and crossing angle ( $\Omega$ ).

| Structural element  | PDB:2L35 |              | Micelle  |              | Bilayer  |              |
|---------------------|----------|--------------|----------|--------------|----------|--------------|
|                     | $D$ (Å)  | $\Omega$ (°) | $D$ (Å)  | $\Omega$ (°) | $D$ (Å)  | $\Omega$ (°) |
| DAP12-1 and NKG2C   | 9.6±0.4  | 3.6±1.8      | 9.9±0.5  | 3.9±1.8      | 9.9±0.3  | 4.0±2.2      |
| DAP12-2 and NKG2C   | 11.0±0.4 | 10.9±2.8     | 10.6±0.6 | 11.8±2.5     | 10.4±0.7 | 10.7±2.2     |
| DAP12-1 and DAP12-2 | 9.2±0.4  | 12.5±1.7     | 9.4±0.6  | 10.8±2.8     | 9.7±0.4  | 11.3±0.3     |

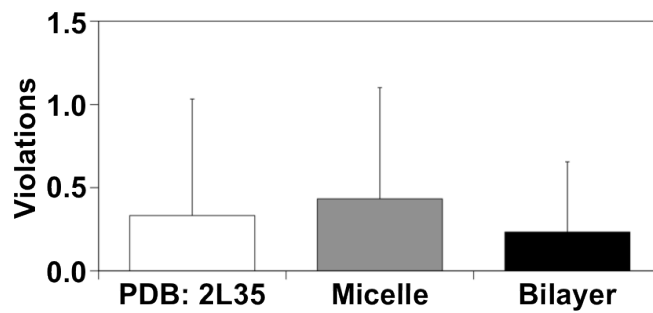

**Figure S1** The average number of violated NOE distance restraints in the different systems with a cutoff value of 0.5 Å. 15 structures with the least violations were selected for the restrained MD simulations.

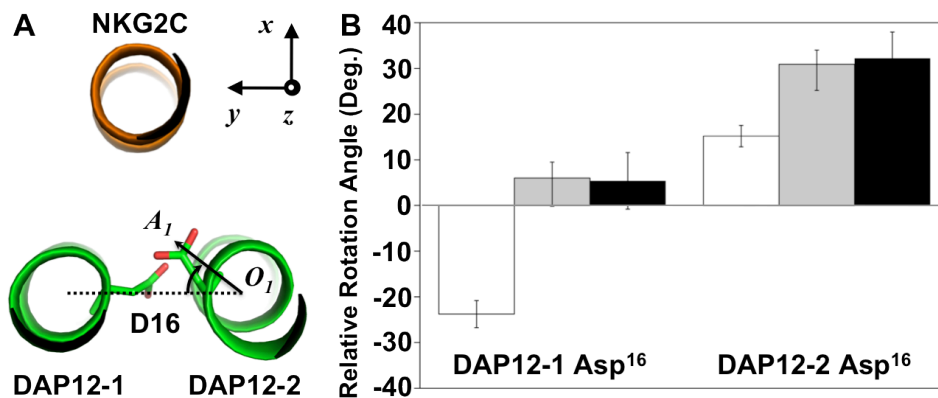

**Figure S2** Relative rotation angles of Asp<sup>16</sup> in DAP12. (A) The top view of one representative structure from the micelle systems. The rotation angles were calculated by aligning DAP12's principal plane to the  $y$ - $z$  plane, keeping the NKG2C above the principal plane, and measuring the angles of the geometrical center of DAP12-2 Asp<sup>16</sup> side-chain oxygen atoms ( $A_I$ ) from the DAP12-2 ( $O_I$ ) relative to the principal plane (similarly for DAP12-1 Asp<sup>16</sup>). If the angle is negative, this Asp<sup>16</sup> is below the DAP12 principal plane and outside the interface. (B) Average DAP12 Asp<sup>16</sup>'s relative rotation angle in different systems (PDB:2L35: white, micelle: gray, bilayer: black).

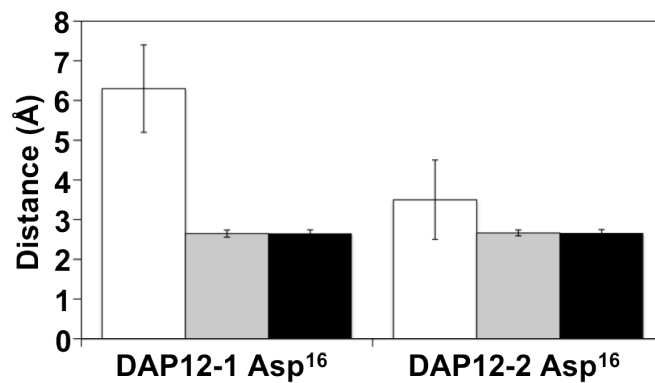

**Figure S3** The distance between the polar groups of DAP12 Asp<sup>16</sup>s and NKG2C Lys<sup>52</sup> in the different systems (PDB:2L35: white, micelle: gray, bilayer: black). The distance is between the geometrical center of one DAP12 Asp<sup>16</sup> side-chain oxygens and the NKG2C Lys<sup>52</sup> side-chain nitrogen.

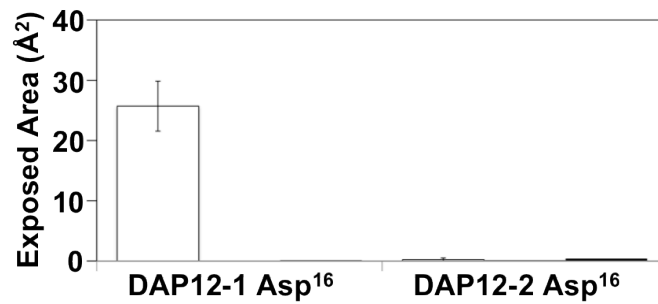

**Figure S4** Water accessible surface area of DAP12 Asp<sup>16</sup> in the different systems (PDB:2L35: white, micelle: gray, bilayer: black).

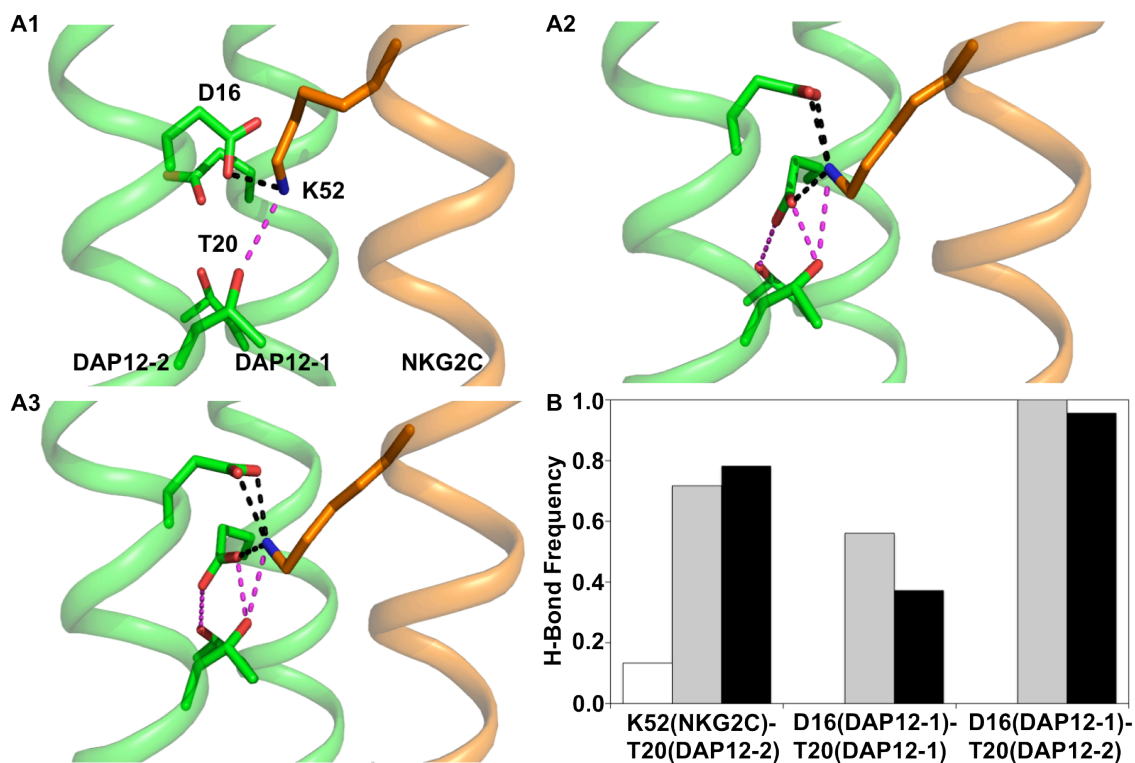

**Figure S5** The interaction network at Asp<sup>16</sup>-Thr<sup>20</sup>-Lys<sup>52</sup> in (A1) PDB:2L35, (A2) the micelle system, and (A3) the bilayer system, respectively. The H-bond is defined by  $d \leq 2.8 \text{ \AA}$  and  $120^\circ \leq \theta \leq 180^\circ$ , where  $d$  is the distance between donor and acceptor atoms, and  $\theta$  is the H-bond angle. The donors are HZ1/HZ2/HZ3 of NKG2C Lys<sup>52</sup> side chain, HG1 of DAP12-1/DAP12-2 Thr<sup>20</sup> side chain, and the acceptors are OG1 of DAP12-2 Thr<sup>20</sup> side chain, OD1/OD2 of DAP12-1 Asp<sup>16</sup> side chain (CHARMM atom types). The black dotted line represents the salt bridges. The magenta dotted line shows the all-possible putative H-bonds. In the refined structures, the NKG2C Lys<sup>52</sup> can form two H-bonds maximally. The frequency of forming those H-bonds in the different systems (PDB:2L35: white, micelle: gray, bilayer: black) are shown in (B).



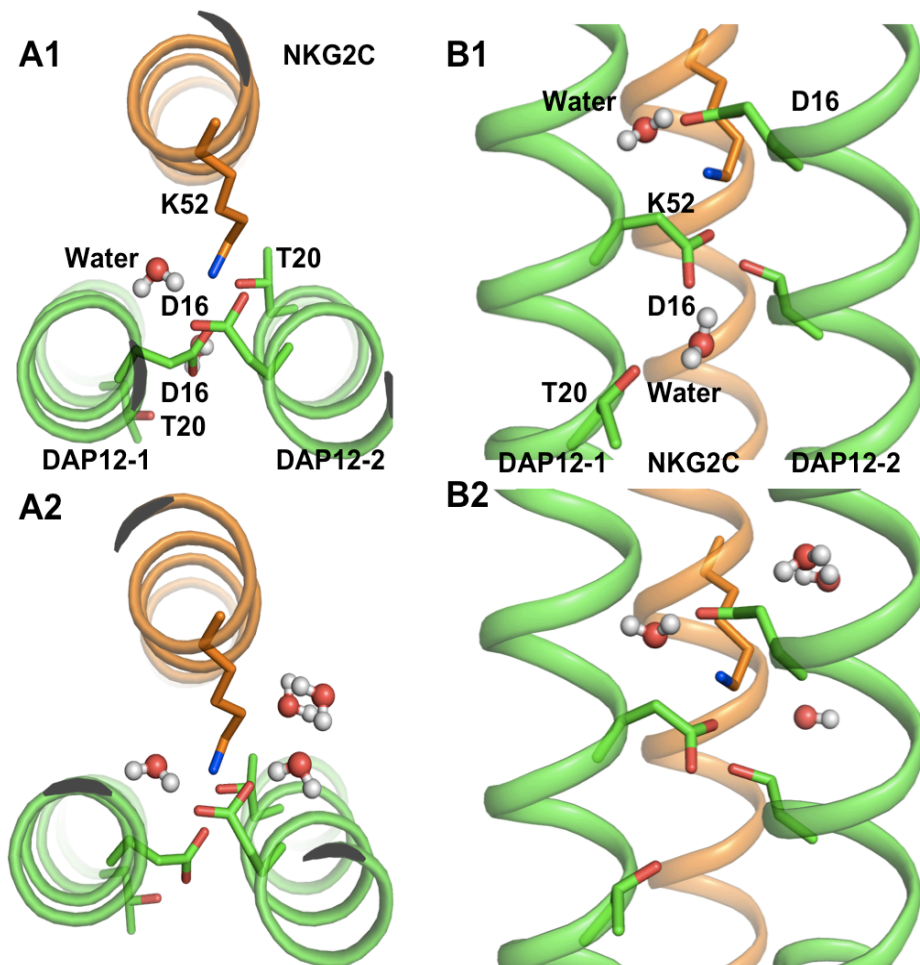

**Figure S6** Top and side views of the DAP12-NKG2C complex showing the water molecules (*spheres*) near the key interfacial residues (*sticks*) in (*A1, B1*) micelle or (*A2, B2*) bilayer systems. All other water molecules and the protein side chains are omitted for clarity.

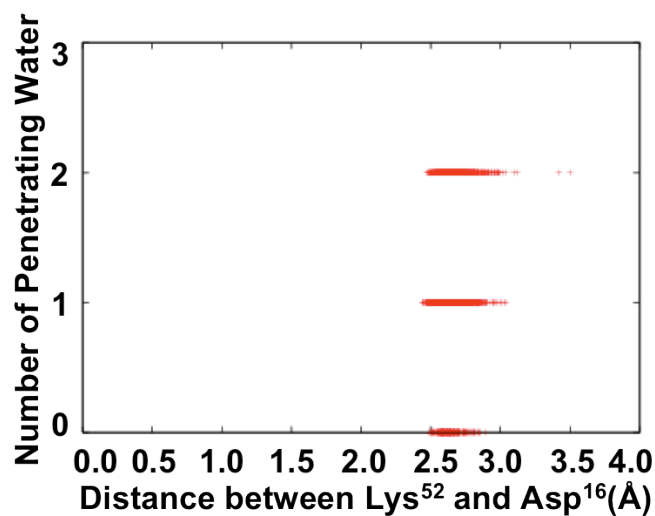

**Figure S7** The relationship between the number of water molecules near NKG2C Lys<sup>52</sup> and DAP12-1 Asp<sup>16</sup> and the salt bridge formation between NKG2C Lys<sup>52</sup> and DAP12-1 Asp<sup>16</sup>. The salt bridge formation is indicated in the  $x$  axis by the distance between the NKG2C Lys<sup>52</sup> side-chain nitrogen and DAP12-1 Asp<sup>16</sup> side-chain oxygens from a MD-refined simulation system that had penetrating water molecules during the simulation. This plot illustrates that the salt bridge is maintained regardless of water molecules near the key polar groups.

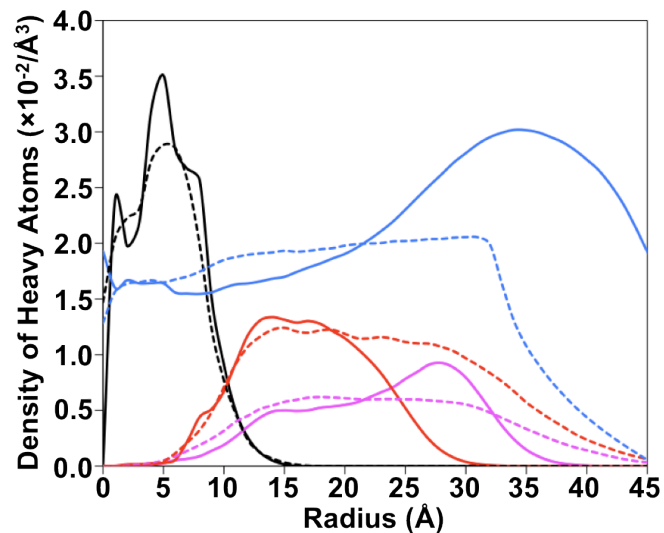

**Figure S8** Cylinder radial distribution of system components (protein: black, detergent/lipid head group: magenta, detergent/lipid carbon tail: red, water: blue) around the DAP12-NKG2C complex principal axis in the micelle (solid lines) and in the bilayer (dotted lines) systems. In the micelle systems, the principal axis of DAP12-NKG2C was aligned to the  $z$  axis. In the bilayer systems, the  $z$  axis corresponds to the membrane normal. The component distributions are similar in the micelle and in the bilayer within the radius of 20 Å.
